# Supplementary material for: Inhibition of USP7 activity selectively eliminates senescent cells in part via restoration of p53 activity
Source: PubMed Central journal article supplement (PMC7059172; doi:10.1111/acel.13117), 2020-02-16
Supplement: ACEL-19-e13117-s001.pdf [file ACEL-19-e13117-s001.pdf]

## Supporting Information

He Y et al. Inhibition of USP7 activity selectively eliminates senescent cells in part via restoration of p53 activity

| <b>Supplementary Item</b> | <b>Title</b>                                                                         |
|---------------------------|--------------------------------------------------------------------------------------|
| Supplementary Figure 1    | Comparison of non-senescent (non-SnCs) and senescent cells (SnCs)                    |
| Supplementary Figure 2    | Inhibition of USP7 activity selectively kills SnCs in a cell-type independent manner |
| Supplementary Figure 3    | p53 knockout did not affect the induction of senescence in WI-38 cells by IR         |
| Supplementary Figure 4    | Synergistic killing effect of P5091 and ABT263 on SnCs                               |
| Supplementary Figure 5    | Treatment with P5091 does not cause observable toxicity in mice                      |
| Supplementary Table 1     | Reagents and supplies used in <i>in vitro</i> and <i>in vivo</i> experiments         |
| Supplementary Table 2     | SgRNA sequence for p53 knockout by CRISPR/Cas9 genomic editing                       |
| Supplementary Table 3     | Antibodies used for Western blotting analyses                                        |
| Supplementary Table 4     | Taqman gene expression probes used for qRT-PCR                                       |

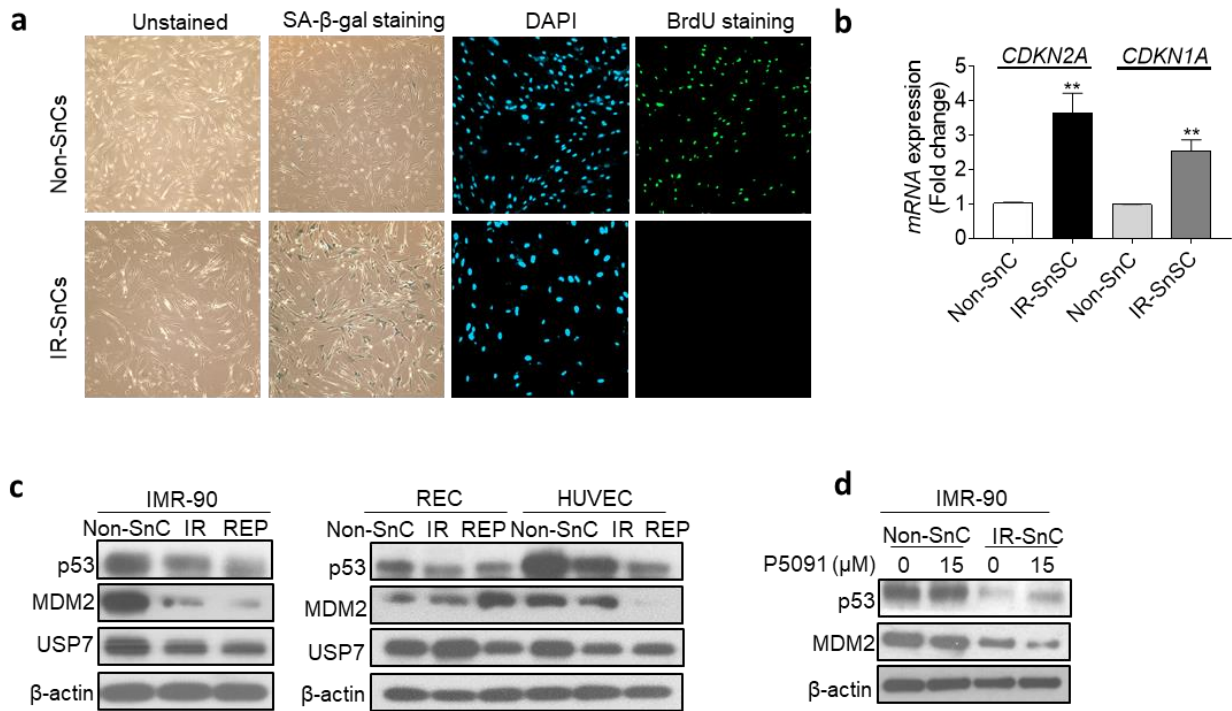

**Supplementary Fig. 1. Comparison of non-senescent (non-SnC) and senescent cells (SnC).** (a) Senescence-associated beta-galactosidase (SA-β-gal), DAPI (nucleus) and BrdU (DNA incorporation) staining in non-SnC and IR-SnC WI-38 cells. (b) Levels of *CDKN2A* (*p16*) and *CDKN1A* (*p21*) mRNA in non-SnC and IR-SnC WI-38 cells. \*\* $p < 0.01$  vs. non-SnC. (c) Expression of p53, MDM2 and USP7 in non-SnC and SnC IMR-90 fibroblast cells (left panel), renal epithelial cells (REC) and human umbilical vein endothelial cells (HUVEC) (right panel) induced by ionizing radiation (IR) or extensive replication (REP). (d) USP7 inhibition with P5091 selectively reduces MDM2 and increases p53 expression in IR-SnC IMR-90 cells.

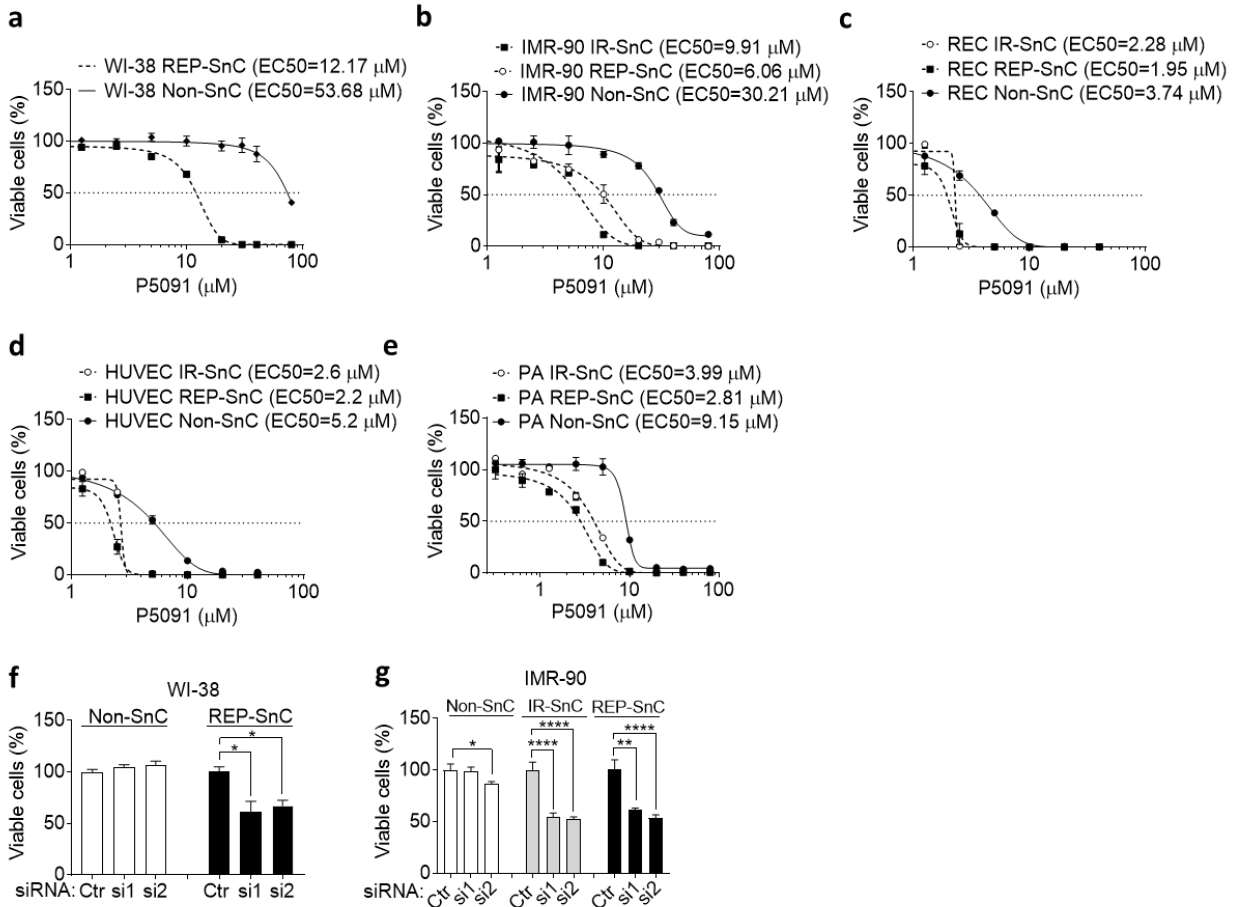

**Supplementary Fig. 2. Inhibition of USP7 activity selectively kills SnCs in a cell-type independent manner.** (a-e) Effect of USP7 inhibition with P5091 on cell viability in non-SnC, SnCs induced by IR (IR-SnC) or extensive replication (REP-SnC). WI-38, WI-38 fibroblast cells; IMR-90, IMR-90 fibroblast cells; REC, renal epithelial cells; HUVEC, human umbilical vein endothelial cells; and PA, pre-adipocytes. Cell viability was determined after they were treated with different concentrations of P5091 for 72 h (n = 3). (f) Effect of USP7 knockdown with siRNA on cell viability in non-SnC and REP-SnC WI-38 cells, and non-SnC, IR-SnC and REP-SnC IMR-90 cells. Ctr, control USP7 siRNA; si1, USP7 siRNA 1; and si2, USP7 siRNA 2. All the data are presented as mean  $\pm$  SEM (n = 3). \*p<0.05, \*\*p<0.01, and \*\*\*\*p<0.0001 vs. Ctr.

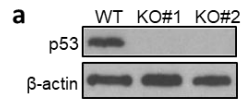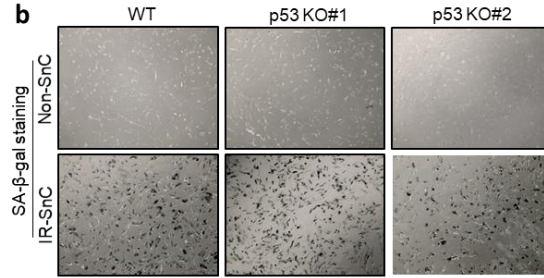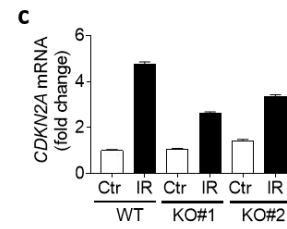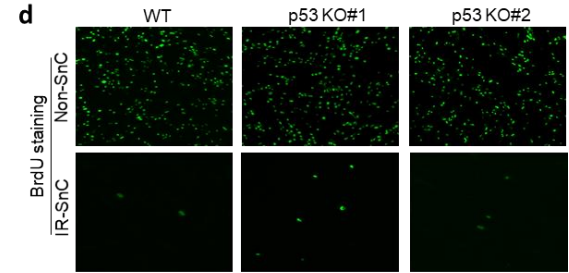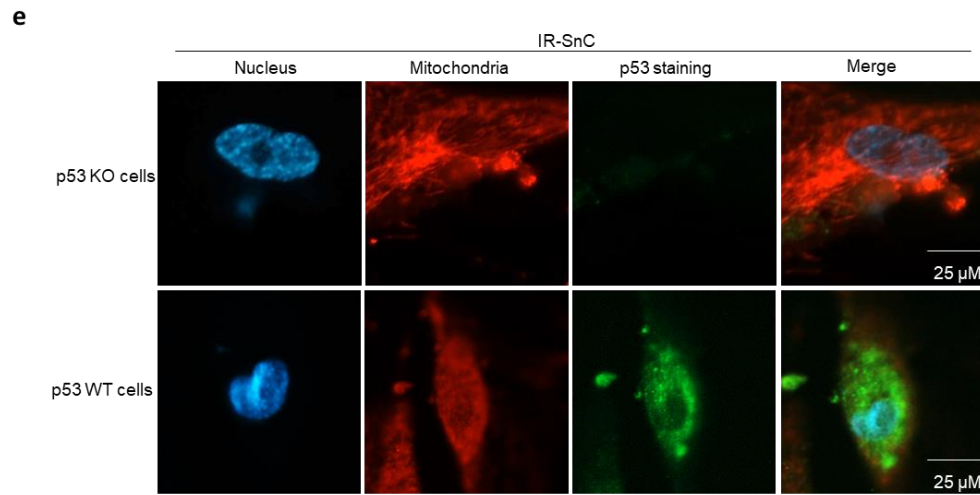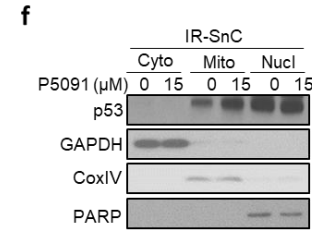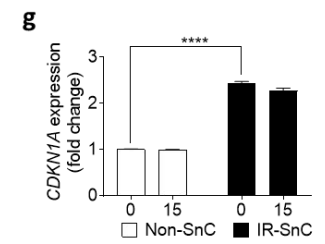

**Supplementary Fig. 3. p53 knockout did not affect the induction of senescence in WI-38 cells by IR.** (a) Confirmation of the efficiency of p53 knockout (KO) in WI-38 cells using the CRISPR/cas9 technology by Western blotting. WT, wild-type cells; KO#1, p53 sgRNA 1 generated p53 KO cells; and KO#2, p53 sgRNA 2 generated p53 KO cells. (b) Representative SA- $\beta$ -gal staining images demonstrate that both WT and p53 KO WI-38 cells underwent senescence after exposure to IR. (c) Expression of *CDKN2A* (*p16*) mRNA in WT, p53 KO#1, and p53 KO#2 WI-38 cells before (Ctr) or after exposure to IR. (d) Representative BrdU staining images demonstrate that both WT and p53 KO WI-38 cells became permanently growth arrested after exposure to IR. (e) Representative images of p53 immunofluorescent staining (green) in WT and p53 KO IR-SnC WI-38 cells. The mitochondria and nucleus were stained with MitoTracker Red CMXRos (red) and DAPI (blue), respectively. (f) Representative images of Western blotting analysis of p53 expression in cytoplasm, mitochondria and nuclei in IR-SnC WI-38 cells after they were treated with vehicle or P5091 overnight. GAPDH, CoxIV and PARP were used to validate fraction purity. Cyto, cytoplasm; Mito, mitochondria; Nucl, nucleus. (g) Expression of *CDKN1A* (*p21*) mRNA in in non-SnC and IR-SnC WI-38 cells after treatment with P5091 for 9 h were measured by quantitative PCR (qPCR). Data are presented as mean  $\pm$  SEM (n=3) of fold changes. \*\*\*\*p<0.0001.

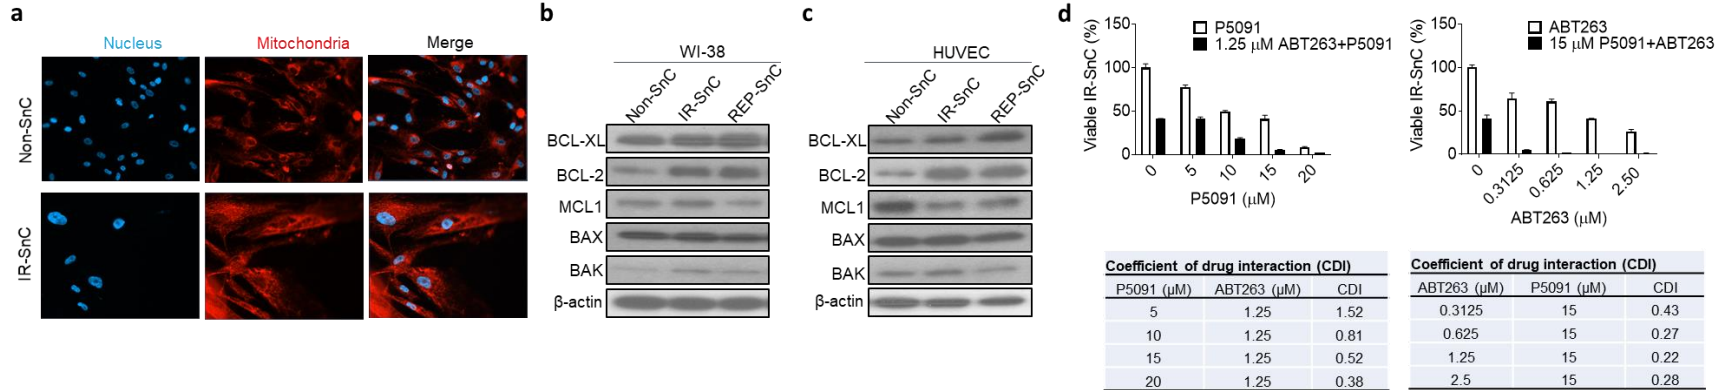

**Supplementary Fig. 4. Synergistic killing effect of P5091 and ABT263 on SnCs.** (a-c) Comparison of mitochondria content and expression of mitochondrial pro- and anti-apoptotic proteins in Non-SnC and IR-SnC WI-38 cells. (a) Representative images of mitochondria and nucleus staining of non-SnC and IR-SnC WI-38 cells. Mitochondria and nucleus were stained by MitoTracker Red CMXRos (red) and DAPI (blue), respectively. Expression of the BCL-2 family proteins in Non-SnC, IR-SnC and REP-SnC WI-38 (b) and HUVEC cells (c) were detected by Western blotting. (d) Combination of P5091 and ABT263 synergistically kills SnCs. Viable IR-SnC WI-38 cells were determined 72 h after they were incubated with indicated concentrations of P5091 and/or ABT263. Percentages of viable cells are presented as mean  $\pm$  SEM ( $n = 3$ ) in the upper panels and the values of the combination index (CI) for each combination treatment are presented in the lower panels (CI < 1 indicating synergy).

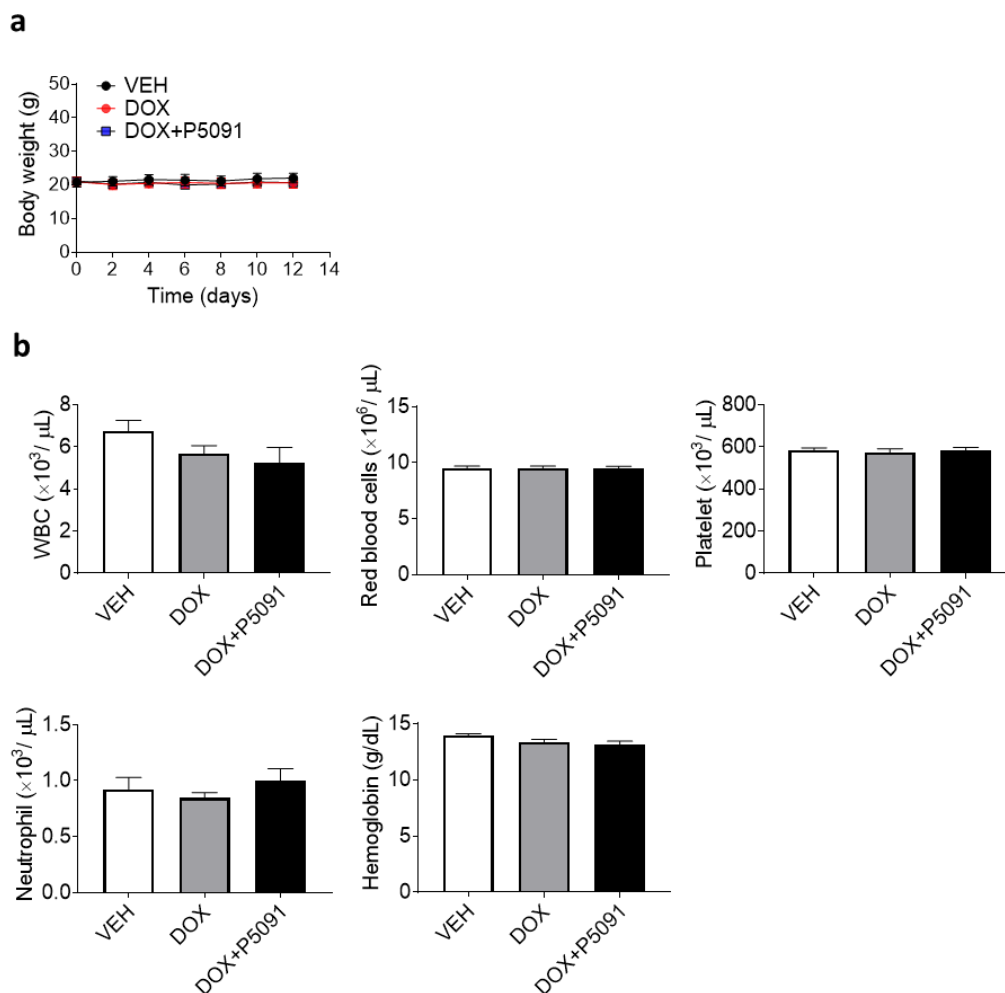

**Supplementary Fig. 5. Treatment with P5091 does not cause observable toxicity in mice.** (a) No body weight changes in mice after P5091 treatment for 12 days as shown in Fig. 4a. (b) P5091 treatment has no effect on various blood cell counts in mice. Levels of white blood cells (WBC), red blood cells, platelets, neutrophil, and hemoglobin in mice after receiving treatment with vehicle (VEH), doxorubicin (DOX), and DOX plus P5091 as shown in Fig. 4a. All the data are presented as mean  $\pm$  SEM (n = 10).

**Supplementary Table 1. Reagents and supplies used in *in vitro* and *in vivo* experiments**

| <b>Name</b>                                        | <b>Cat#</b>   | <b>Vendor</b>                                    |
|----------------------------------------------------|---------------|--------------------------------------------------|
| DMEM                                               | 12430054      | Thermo Fisher Scientific, Waltham, MA, USA       |
| FBS                                                | S11150H       | Atlanta Biologicals, Flowery Branch, GA, USA     |
| Penicillin-streptomycin                            | 15140122      | Thermo Fisher Scientific, Waltham, MA, USA       |
| Renal epithelial cell medium                       | PCS-400-030   | ATCC, Manassas, VA, USA                          |
| Renal epithelial cell growth kit                   | PCS-400-040   | ATCC, Manassas, VA, USA                          |
| Fibroblast basal medium                            | PCS-201-030   | ATCC, Manassas, VA, USA                          |
| Fibroblast growth kit                              | PCS-201-041   | ATCC, Manassas, VA, USA                          |
| EGM-2 BulletKit                                    | CC-3162       | Lonza, Basel, Switzerland                        |
| Lipofectamine 2000 reagent                         | 11668019      | Life Technologies, Carlsbad, CA, USA             |
| Polybrene                                          | TR-1003-G     | Sigma-Aldrich, St. Louis, MO, USA                |
| Lipofectamine RNAiMax                              | 13778075      | Thermo Fisher Scientific, Waltham, MA, USA       |
| Opti-MEM Medium                                    | 31985070      | Thermo Fisher Scientific, Waltham, MA, USA       |
| CellTiter-Glo Luminescent Cell Viability Assay kit | G7570         | Promega, Madison, WI, USA                        |
| Q-VD-Oph                                           | A1901         | APExBIO, Houston, TX, USA                        |
| Alexa Fluor 647-Annexin V                          | 640912        | BioLegend, San Diego, CA, USA                    |
| Propidium iodide                                   | P4170         | Sigma-Aldrich, St. Louis, MO, USA                |
| RIPA buffer                                        | BP-115DG      | Boston BioProducts, Ashland, MA, USA             |
| Protease Inhibitor Cocktail                        | P8340         | Sigma-Aldrich, St. Louis, MO, USA                |
| Phosphatase Inhibitor Cocktail                     | P0044         | Sigma-Aldrich, St. Louis, MO, USA                |
| Pierce BCA protein Assay kit                       | 23225         | Thermo Fisher Scientific, Waltham, MA, USA       |
| Mini-PROTEAN TGX                                   | 456-1094      | Bio-Rad, Hercules, CA, USA                       |
| PVDF membrane                                      | LC2002        | Invitrolon, Life Technologies, Carlsbad, CA, USA |
| TBST                                               | J77500        | Affymetrix, Santan Clara, CA, USA                |
| Non-fat dry milk                                   | sc-2324       | Santa Cruz Biotechnology, Dallas, TX, USA        |
| Chemiluminescent HRP substrate                     | WBKLS0500     | MilliporeSigma, Billerica, MA, USA               |
| Cell Fractionation Kit                             | ab109719      | Abcam, Cambridge, MA, USA                        |
| Pierce IP Lysis Buffer                             | 87788         | Thermo Fisher Scientific, Waltham, MA, USA       |
| Pierce Protein A/G Magnetic Beads                  | 88802         | Thermo Fisher Scientific, Waltham, MA, USA       |
| RNeasy Mini Kit                                    | 74106         | Qiagen, Gaithersburg, MD, USA                    |
| cDNA Reverse Transcription Kit                     | 4368813       | Thermo Fisher Scientific, Waltham, MA, USA       |
| TaqMan Fast Advanced Master Mix                    | 4444965       | Thermo Fisher Scientific, Waltham, MA, USA       |
| Glass bottom microwell dishes                      | P35G-1.5-14-C | MatTek Corp., Ashland, MA, USA                   |



|                                                  |                 |                                                    |
|--------------------------------------------------|-----------------|----------------------------------------------------|
| MitoTracker Red CMXRos                           | M7512           | Thermo Fisher Scientific, Waltham, MA, USA         |
| 4% paraformaldehyde                              | 199431          | Affymetrix, Santa Clara, CA, USA                   |
| Triton X-100                                     | T8787           | Sigma-Aldrich, St. Louis, MO, USA                  |
| BSA                                              | BP9703          | Fisher Scientific, Silver Spring, MD, USA          |
| Anti-mouse IgG-Alexa Fluo488                     | A-11001         | Thermo Fisher Scientific, Waltham, MA, USA         |
| $\beta$ -Galactosidase Staining Kit              | 9860            | Cell signaling, Danvers, MA, USA                   |
| Click-iT Plus EdU Alexa Fluor 488<br>Imaging Kit | C10637          | Thermo Fisher Scientific, Waltham, MA, USA         |
| P5091                                            | HY-15667        | MedChem Express, Monmouth Junction, NJ, USA        |
| <b>P22077</b>                                    | <b>HY-13865</b> | <b>MedChem Express, Monmouth Junction, NJ, USA</b> |

**Supplementary Table 2. SgRNA sequence for p53 knockout by CRISPR/Cas9 genomic editing**

| <b>Name</b>               | <b>Sequence or ID</b>            | <b>Vendor</b>            |
|---------------------------|----------------------------------|--------------------------|
| <i>TP53</i> -sg 1 Forward | 5'-CACCGACTTCCTGAAAACAACGTTC-3'  | IDT, Coralville, IA, USA |
| <i>TP53</i> -sg 1 Reverse | 5'-AAACGAACGTTGTTTTTCAGGAAGTC-3' | IDT, Coralville, IA, USA |
| <i>TP53</i> -sg 2 Forward | 5'-CACCGCCCCGGACGATATTGAACAA-3'  | IDT, Coralville, IA, USA |
| <i>TP53</i> -sg 2 Reverse | 5'-AAACTTGTTCAATATCGTCCGGGGC-3'  | IDT, Coralville, IA, USA |

**Supplementary Table 3. Antibodies used for Western blotting analyses**

| <b>Name</b>        | <b>Cat#</b> | <b>Vendor</b>                    |
|--------------------|-------------|----------------------------------|
| USP7               | 4833S       | Cell signaling, Danvers, MA, USA |
| MDM2               | 86934S      | Cell signaling, Danvers, MA, USA |
| p53                | 9282S       | Cell signaling, Danvers, MA, USA |
| Phosphorylated p53 | 2521S       | Cell signaling, Danvers, MA, USA |
| Cleaved PAPR       | 9541S       | Cell signaling, Danvers, MA, USA |
| PAPR               | 9532S       | Cell signaling, Danvers, MA, USA |
| P21                | 2947S       | Cell signaling, Danvers, MA, USA |
| FAS                | 4233S       | Cell signaling, Danvers, MA, USA |
| PUMA               | 4976S       | Cell signaling, Danvers, MA, USA |
| BAX                | 2772S       | Cell signaling, Danvers, MA, USA |
| BAK                | 12105S      | Cell signaling, Danvers, MA, USA |
| NOXA               | 14766S      | Cell signaling, Danvers, MA, USA |
| $\beta$ -actin     | 4970S       | Cell signaling, Danvers, MA, USA |
| GAPDH              | 97166S      | Cell signaling, Danvers, MA, USA |
| CoxIV              | 4850S       | Cell signaling, Danvers, MA, USA |
| BCL-XL             | 2762S       | Cell signaling, Danvers, MA, USA |
| BCL-2              | 2872S       | Cell signaling, Danvers, MA, USA |
| MCL1               | 5453S       | Cell signaling, Danvers, MA, USA |
| P53 (for IP)       | sc-126X     | Santa Cruz, Dallas, TX, USA      |
| IgG                | sc-2025     | Santa Cruz, Dallas, TX, USA      |

**Supplementary Table 4. Taqman gene expression probes used for qRT-PCR**

| <b>Gene</b>          | <b>Cat#</b> | <b>ID</b>     |
|----------------------|-------------|---------------|
| Human <i>CDKN2A</i>  | 4331182     | Hs00923894_m1 |
| Human <i>CDKN1A</i>  | 4331182     | Hs00355782_m1 |
| Human <i>PMAIP1</i>  | 4331182     | Hs00560402_m1 |
| Human <i>MDM2</i>    | 4331182     | Hs00242813_m1 |
| Human <i>FAS</i>     | 4331182     | Hs00163653_m1 |
| Human <i>BBC3</i>    | 4331182     | Hs00248075_m1 |
| Human <i>GAPDH</i>   | 4351370     | Hs02758991_g1 |
| Mouse <i>Cdkn2a</i>  | 4351370     | Mm00494449_m1 |
| Mouse <i>Hprt</i>    | 4351370     | Mm01545399_m1 |
| Mouse <i>Il1a</i>    | 4351370     | Mm99999060_m1 |
| Mouse <i>Il1b</i>    | 4351370     | Mm00434228_m1 |
| Mouse <i>Il6</i>     | 4351370     | Mm00446190_m1 |
| Mouse <i>Tnfsf11</i> | 4351370     | Mm00441908_m1 |

**Footnotes:** All probes were purchased from Thermo Fisher Scientific, Waltham, MA, USA.
